# Supplementary figures and images for: An Automated High-Throughput Screening (HTS) Spotter for 3D Tumor Spheroid Formation
Source: MDPI journal article supplement (doi:10.3390/ijms24021006), 2023-01-05

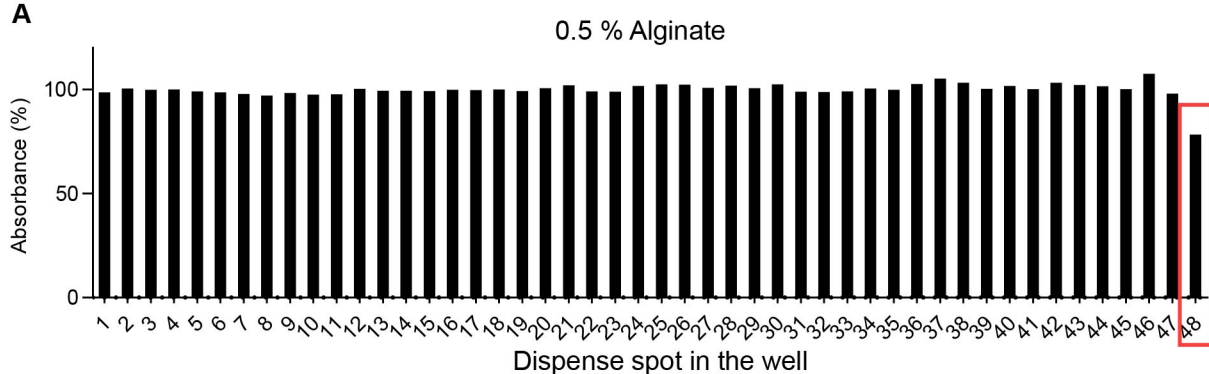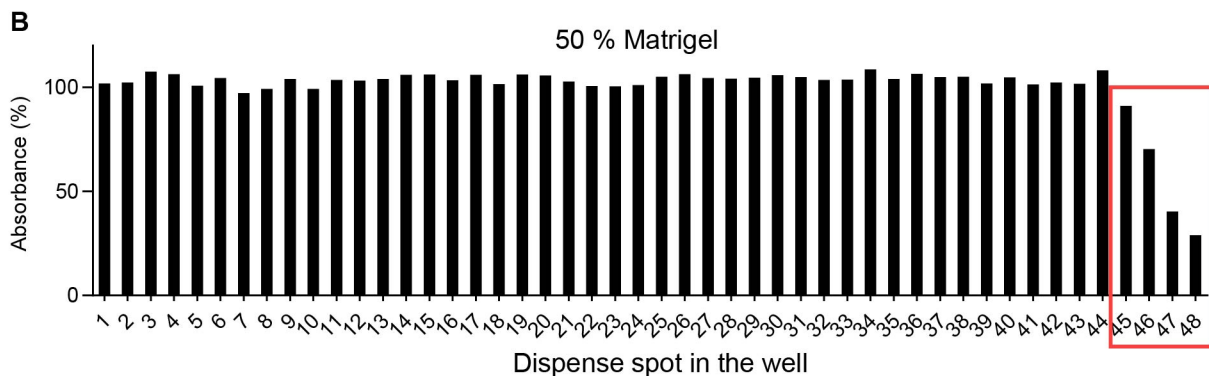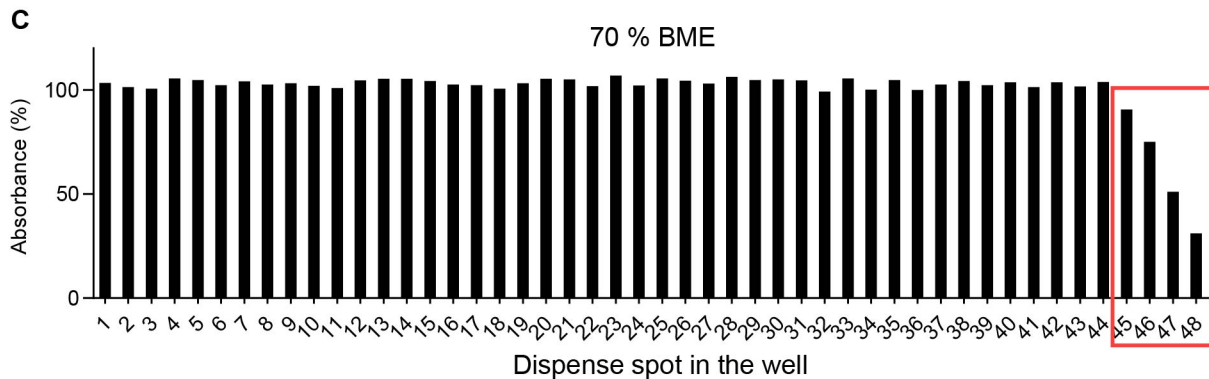

Supplement: s1 [file s1]
